# Supplementary material for: Shifts from cis-to trans-splicing of five mitochondrial introns in Tolypanthus maclurei
Source: PeerJ. 2021 Oct 1;9:e12260. doi: 10.7717/peerj.12260 (PMC8489412; doi:10.7717/peerj.12260)
Supplement: Supplemental Information 5 [file peerj-09-12260-s005.xlsx]

## Sheet: Table S1
Table S1. Mitochondrial sequence data used in this study.
Species	Source	Annotation	Intron information	Horizontal gene transfer analysis
Cycas taitungensis	AP009381		√
Taxus baccata	MN965359-MN965384		√
Gnetum gnemon	MN965191-MN965209		√
Picea abies	MN965242-MN965284		√
Amborella trichopoda	KF754799-KF754803	√	√
Liriodendron tulipifera	KC821969	√	√	√
Allium cepa	AP018390		√
Oryza sativa indica	DQ167399	√	√	√
Phoenix dactylifera	JN375330		√	√
Acacia ligulata	MH933866			√
Glycine max	NC_020455		√	√
Malus x domestica	NC_018554			√
Betula pendula	LT855379			√
Fagus sylvatica	MT446430			√
Cucurbita pepo	GQ856148			√
Ricinus communis	HQ874649			√
Salix suchowensis	KU056812			√
Eucalyptus grandis	NC_040010			√
Gossypium hirsutum	JX065074			√
Arabidopsis thaliana	BK010421	√	√	√
Citrus sinensis	NC_037463			√
Vitis vinifera	FM179380	√	√	√
Erythropalum scandens	MT888102-MT888134		√	√
Santalum album	SRX4079976		√	√
Malania oleifera	MT902145		√	√
Tolypanthus maclurei	This study		√	√
Gaiadendron punctatum	DQ110147 DQ110183 DQ110339 GU351664			√
Amyema quaternifolia	DQ110143 DQ110163 DQ110298			√
Tapinanthus sp.	DQ110160 DQ110361			√
Loranthus europaeus	MG233993 MG233994 MG233995 MG233996 MG233997 MG233998 MG233999 MG234000 MG234001 MG234002 MG234003 MG234004 MG234005 MG234006 MG234007 MG234008 MG234009 MG234010 MG234011 MG234012 MG234013 MG234014 MG234015 MG234016 MG234018 MG234019 MG234020 MG234021 MG234022 MG234023 MG234024			√
Dendrophthoe pentandra	EU280999 DQ110176 DQ110337			√
Struthanthus sp.	KT709665			√
Tripodanthus acutifolius	KT709666			√
Ombrophytum subterraneum	MT076267-MT076320		√
Lophophytum mirabile	KU992322–KU992380,KX792461		√
Beta macrocarpa	FQ378026			√
Silene latifolia	HM562727			√
Mirabilis himalaica	MT535663			√
Actinidia eriantha	MH645952			√
Camellia sinensis	MK574876 MK574877			√
Helianthus annuus	MG770607			√
Daucus carota	JQ248574		√	√
Nicotiana tabacum	NC_006581	√	√	√
Boea hygrometrica	JN107812			√
Hesperelaea palmeri	KX545367			√
Mimulus guttatus	JN098455			√
Rhazya stricta	KJ485850		√	√
Morinda citrifolia	KY492106 KY492164 KY637238 KY637296 KY637354 KY637412 KY637470 KY637528 KY637586 KY637644 KY637700 KY637756 KY637814 KY637872 KY637930 KY638046 KY638104 KY638162 KY638220 KY638278 KY638336 KY638393 KY638451 KY638507 KY638565 KY638623 KY638669 KY638727 KY638797 KY638855 KY638913 KY638971 KY639029 KY639087 KY639145 KY639192 KY639243			√
