# Supplementary material for: Shifts from cis-to trans-splicing of five mitochondrial introns in Tolypanthus maclurei
Source: PeerJ. 2021 Oct 1;9:e12260. doi: 10.7717/peerj.12260 (PMC8489412; doi:10.7717/peerj.12260)
Supplement: Supplemental Information 6 [file peerj-09-12260-s006.xlsx]

## Sheet: Table S2
Figure S2. Repeat content and evaluation of repeat-mediated recombination in the mitogenome of Tolypanthus maclurei
Repeat pair		Repeat A		Repeat B		Repeat type	Number of read pairs supporting alternative configurations
Identity (%)	Length* (bp)	Start	End	Start	End
99.967	6118	164718	170835	103024	109140	Direct	-
100	1737	197186	198922	100217	101953	Reverse	-
99.784	1387	228010	229396	106173	107559	Reverse	-
99.784	1387	167867	169253	228010	229396	Reverse	-
100	686	195580	196265	35003	35688	Reverse	-
100	211	187960	188170	119385	119595	Direct	3
93.035	201	235572	235772	41035	41231	Reverse	0
100	105	110952	111056	60016	60120	Direct	3
97.03	101	163693	163792	95665	95765	Direct	0
87.129	101	219367	219464	256486	256580	Reverse	0
87.129	101	256486	256580	219367	219464	Reverse	0
100	97	147366	147462	18082	18178	Reverse	0
96.809	94	255638	255730	215106	215199	Direct	0
98.876	89	150512	150600	38666	38754	Reverse	0
94.186	86	77147	77228	69563	69648	Direct	0
91.463	82	56097	56178	178796	178877	Reverse	0
97.531	81	105848	105928	37786	37866	Direct	0
98.701	77	254657	254733	41644	41720	Direct	2
100	77	227563	227639	121357	121433	Reverse	0
93.421	76	178802	178877	56097	56172	Reverse	0
98.667	75	87617	87691	107004	107078	Reverse	0
100	74	137596	137669	170963	171036	Reverse	0
100	72	168701	168772	87617	87688	Reverse	0
98.571	70	107550	107619	180173	180242	Direct	2
98.571	70	169244	169313	180173	180242	Direct	3
98.551	69	60243	60311	16387	16455	Direct	0
94.203	69	50629	50694	77162	77230	Direct	0
95.652	69	129139	129207	16405	16473	Reverse	0
91.304	69	170847	170915	247366	247434	Reverse	0
100	68	173970	174037	16398	16465	Direct	0
91.176	68	185374	185437	123656	123723	Reverse	0
100	67	253852	253918	31442	31508	Direct	0
85.075	67	112857	112923	191962	192027	Reverse	26
100	66	227562	227627	203376	203441	Reverse	0
100	65	203376	203440	121369	121433	Direct	0
92.308	65	123659	123723	185374	185434	Reverse	0
100	65	241431	241495	227576	227640	Reverse	0
86.154	65	253649	253713	71748	71812	Reverse	0
100	64	227563	227626	44409	44472	Direct	1
100	64	50628	50691	69583	69646	Direct	0
100	64	241432	241495	121357	121420	Direct	0
96.875	64	71409	71472	60232	60295	Direct	0
100	64	203377	203440	44409	44472	Reverse	1
100	64	121370	121433	44409	44472	Reverse	0
96.875	64	115227	115290	94161	94224	Reverse	3
98.413	63	16411	16473	129139	129201	Reverse	0
96.774	62	180830	180891	77824	77885	Direct	0
98.387	62	124254	124315	26194	26255	Reverse	0
95.082	61	129147	129207	173977	174037	Reverse	0
98.333	60	169301	169360	212187	212245	Reverse	0
98.333	60	212187	212245	107607	107666	Reverse	0
93.22	59	177840	177898	126210	126264	Reverse	0
100	58	173970	174027	60254	60311	Direct	3
98.276	58	58599	58656	9227	9284	Direct	0
96.491	57	213688	213744	143311	143367	Reverse	0
94.737	57	67933	67989	140906	140962	Reverse	0
94.643	56	72591	72646	42071	42126	Direct	0
96.429	56	212286	212341	50249	50304	Reverse	0
98.182	55	173983	174037	129147	129201	Reverse	0
98.148	54	3803	3856	213850	213903	Direct	0
94.444	54	70010	70063	156404	156457	Direct	0
96.296	54	140909	140962	67933	67986	Reverse	0
96.226	53	16387	16439	71420	71472	Direct	0
90.566	53	147444	147494	219156	219207	Direct	0
100	52	72881	72932	97269	97320	Direct	0
100	52	203376	203427	241444	241495	Direct	0
96.154	52	43263	43314	78106	78157	Reverse	0
100	51	241445	241495	44422	44472	Reverse	0
98.039	51	45374	45424	91034	91084	Reverse	2
94.118	51	129157	129207	60261	60311	Reverse	0
98	50	157010	157059	13142	13191	Reverse	0
98	50	113830	113879	225846	225895	Reverse	0
98	50	13142	13191	157010	157059	Reverse	0
98	50	113830	113879	225846	225895	Reverse	0
*: length of the alignment in BLASTN
-: data not available
