# Supplementary material for: Shifts from cis-to trans-splicing of five mitochondrial introns in Tolypanthus maclurei
Source: PeerJ. 2021 Oct 1;9:e12260. doi: 10.7717/peerj.12260 (PMC8489412; doi:10.7717/peerj.12260)
Supplement: Supplemental Information 7 [file peerj-09-12260-s007.xlsx]

## Sheet: Table S3
Table S3. Mitochondrial plastid insertions (MTPTs) in the Tolypanthus maclurei mitogenome
Mitogenome			Plastomea		Lengthb (bp)	Identity (%)
Start	End	Strand	Start	End
2793	3231	-	11467	11905	440	98.409
7924	8838	-	34609	35521	915	99.454
54169	55721	+	92129	93692	1574	97.205
55716	55899	-	90181	90364	184	100
55891	56372	-	89520	90001	482	100
56466	56679	+	107009	107222	214	100
56682	57403	-	17040	17788	749	95.861
61924	63685	-	71201	72948	1762	98.411
74404	74515	+	96641	96752	112	98.214
83592	84023	+	22157	22589	434	97.926
86406	86739	+	46494	46827	334	100
91689	94291	+	27141	29756	2617	99.236
103141	103256	+	105822	105937	116	100
117693	118608	-	33056	33971	916	99.672
118688	119146	+	85840	86298	459	100
134601	135464	+	25039	25902	864	99.884
138186	138697	-	81940	82451	512	99.805
138729	139297	-	81288	81869	586	94.71
140778	141055	-	54825	55100	278	98.561
141575	142421	-	20964	21810	847	100
152748	153129	+	82563	82942	380	99.183
158812	159846	-	12080	13114	1035	100
164835	164950	-	90597	90712	116	100
175870	177667	-	72932	74729	1798	99.944
177647	178810	+	1	1179	1179	98.134
185403	185508	-	69348	69453	106	100
191976	193218	-	86367	87610	1244	99.357
193219	193524	-	15980	16285	306	99.673
196273	196565	-	48031	48323	293	98.976
211570	212186	-	90762	91378	617	99.514
229600	231561	-	18800	20761	1962	99.898
a: GenBank accession number NC_042257
b: length of the alignment in BLASTN
